# Supplementary material for: Metabolomic and Transcriptomic Profiling Identified Significant Genes in Thymic Epithelial Tumor
Source: MDPI journal article supplement (doi:10.3390/metabo12060567), 2022-06-20
Supplement: s1 [file s1]

Table S3. Multivariate analysis of the correlation of clinical variables with overall survival in TETs.

| Clinical factors | Variables                      | P value | HR (95%CI)          |
|------------------|--------------------------------|---------|---------------------|
| WHO type         | A/AB/B1 vs B2/B3/C             | 0.6     | 0.68 (0.15-3)       |
| Masaoka stage    | I/II vs III/IV                 | 0.34    | 2.3 (0.41-13)       |
| Sex              | Male vs Female                 | 0.7     | 1.4 (0.29-6.5)      |
| Age              | $\leq 60$ vs $>60$ (years old) | 0.089   | 4.5 (0.8-25)        |
| Cluster          | Cluster1 vs Cluster2           | 0.55    | 1.7 (0.29-10)       |
| Metabolite score | High score vs Low score        | 0.028   | 0.077 (0.0079-0.75) |

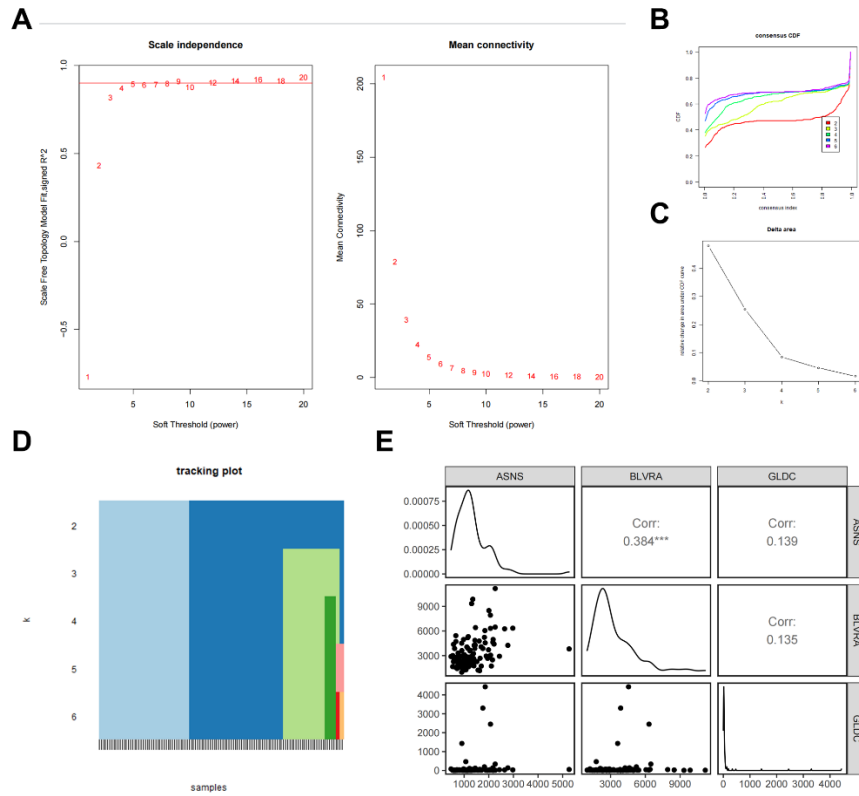

**Figure S2.** (A) A power of  $\beta = 4$  (scale-free  $R^2 = 0.87$ ) was selected as the soft threshold in WGCNA; (B–D): The proportion of expression similarity and ambiguous clustering measures for the 137 TP-MRGs in consensus clustering; (E) Correlation analysis showed no collinear expression existed.

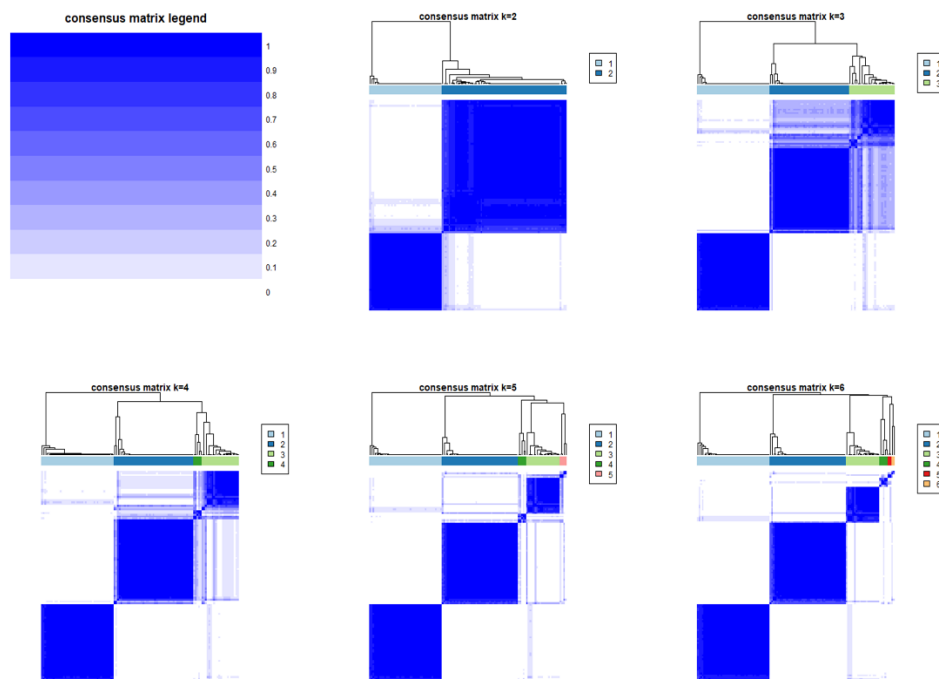

**Figure S3.** (A) The proportion of expression similarity and ambiguous clustering measures for the 137 TP-MRGs in consensus clustering.

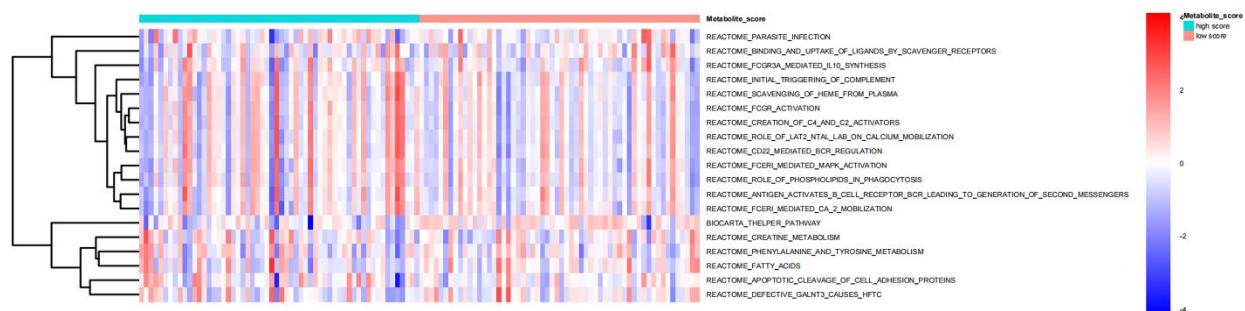

**Figure S4.** Gene set variation analysis (GSVA) showing the differentially enriched pathways in high- and low-metabolic-score groups.
