# Supplementary material for: Metabolomic and Transcriptomic Profiling Identified Significant Genes in Thymic Epithelial Tumor
Source: Metabolites. 2022 Jun 20;12(6):567. doi: 10.3390/metabo12060567 (PMC9228216; doi:10.3390/metabo12060567)
Supplement: Supplementary file 1 [file metabolites-12-00567-s001.zip]

Archive with 4 entries (4 files):
- metabolites-1742929-Figures S1-S4.pdf
- metabolites-1742929-Table S1.xlsx
- metabolites-1742929-Table S2.xlsx
- metabolites-1742929-Table S3.pdf
