# Supplementary material for: Metabolomic and Transcriptomic Profiling Identified Significant Genes in Thymic Epithelial Tumor
Source: Metabolites. 2022 Jun 20;12(6):567. doi: 10.3390/metabo12060567 (PMC9228216; doi:10.3390/metabo12060567)
Supplement: Supplementary file 1 [file metabolites-12-00567-s001.zip › metabolites-1742929-Table S1.xlsx]

## Sheet: table 1 - 副本
	Total	Expected	Hits	Raw p	Impact
Glycerophospholipid metabolism	36	2.7174	7	0.015459	0.47715
Arginine biosynthesis	14	1.0568	4	0.01706	0.2538
Porphyrin and chlorophyll metabolism	30	2.2645	6	0.021531	0.40125
Biosynthesis of unsaturated fatty acids	36	2.7174	5	0.12955	0
Glutathione metabolism	28	2.1135	4	0.15539	0.11548
Purine metabolism	65	4.9065	7	0.21421	0.12352
alpha-Linolenic acid metabolism	13	0.98129	2	0.25674	0.33333
Aminoacyl-tRNA biosynthesis	48	3.6232	5	0.29357	0
Arginine and proline metabolism	38	2.8684	4	0.3214	0.33229
Linoleic acid metabolism	5	0.37742	1	0.32494	0
Histidine metabolism	16	1.2077	2	0.34327	0.22131
Nitrogen metabolism	6	0.4529	1	0.37606	0
D-Glutamine and D-glutamate metabolism	6	0.4529	1	0.37606	0.5
Ether lipid metabolism	20	1.5097	2	0.45305	0.14458
Taurine and hypotaurine metabolism	8	0.60387	1	0.46707	0
Sphingolipid metabolism	21	1.5852	2	0.4789	0.18458
Arachidonic acid metabolism	36	2.7174	3	0.51942	0.3135
Tryptophan metabolism	41	3.0948	3	0.61013	0.12152
Phosphatidylinositol signaling system	28	2.1135	2	0.63751	0.03108
Glycosylphosphatidylinositol (GPI)-anchor biosynthesis	14	1.0568	1	0.66833	0.00399
Butanoate metabolism	15	1.1323	1	0.69359	0
Nicotinate and nicotinamide metabolism	15	1.1323	1	0.69359	0.1943
Glyoxylate and dicarboxylate metabolism	32	2.4155	2	0.70995	0.10582
Glycerolipid metabolism	16	1.2077	1	0.71695	0.01246
Glycine, serine and threonine metabolism	33	2.491	2	0.72607	0.24577
Pentose and glucuronate interconversions	18	1.3587	1	0.75849	0.14062
Pantothenate and CoA biosynthesis	19	1.4342	1	0.77694	0.00714
beta-Alanine metabolism	21	1.5852	1	0.80974	0
Steroid biosynthesis	42	3.1703	2	0.83988	0.08047
Lysine degradation	25	1.8871	1	0.86167	0
Primary bile acid biosynthesis	46	3.4723	2	0.87523	0.01563
Alanine, aspartate and glutamate metabolism	28	2.1135	1	0.89114	0.19712
Inositol phosphate metabolism	30	2.2645	1	0.90724	0.03389
Pyrimidine metabolism	39	2.9439	1	0.95498	0.1069
Tyrosine metabolism	42	3.1703	1	0.96465	0.00674
Fatty acid biosynthesis	47	3.5477	1	0.97641	0
Drug metabolism - cytochrome P450	55	4.1516	1	0.98768	0
Steroid hormone biosynthesis	85	6.4161	1	0.99896	0.03203
