# Supplementary material for: Metabolomic and Transcriptomic Profiling Identified Significant Genes in Thymic Epithelial Tumor
Source: Metabolites. 2022 Jun 20;12(6):567. doi: 10.3390/metabo12060567 (PMC9228216; doi:10.3390/metabo12060567)
Supplement: Supplementary file 1 [file metabolites-12-00567-s001.zip › metabolites-1742929-Table S2.xlsx]

## Sheet: Sheet1
931 MRGs	117 TP-MRGs	3 MSGs
GCLC	CYP26B1	ASNS
LAP3	HCCS	BLVRA
HECW1	GGCT	GLDC
CYP26B1	COX10
SLC7A2	PNPLA4
AK2	PARP3
CD38	DGKG
SLC25A13	SIRT2
HCCS	ASNS
ACSM3	P4HA2
MPO	HSP90AA1
MYCBP2	ARG2
CRLF1	HADHA
AGK	NOS1
GGCT	BLVRB
COX10	DLD
PNPLA4	PITPNM3
NOS2	CYP2D6
MYLIP	PNPLA3
AASS	LIPG
UBE3C	ABCD1
LYPLA2	EARS2
NME1-NME2	DECR1
SLC6A7	LGALS13
ABHD5	CYP3A5
RNF216	AIMP2
LARS2	BLVRA
ALOX5	AK1
UBR7	CYP2C18
RNF14	SLC38A1
DPEP1	GPLD1
CHDH	HARS2
SLC38A5	NME5
CYP3A43	PDE4D
SLC7A9	BCHE
ALAS1	PDE1A
GCLM	ABCB6
UBR2	SLC25A12
HSD17B6	FARSB
TYMP	AGMAT
AGPAT4	PRDX6
PNPLA6	ACOT2
UBA6	PDZD11
RNF19A	NT5C3A
OTC	AKR1D1
PARP3	SLC36A1
TDP1	PEPD
RETSAT	SLC10A2
CTPS2	PPCS
CP	BBOX1
NEDD4L	PLD2
ENTPD2	PARP2
GALC	ART1
DGKG	ASS1
PARP12	UBA1
ALDH18A1	LPIN3
ACAA1	RNF128
BCAT1	CARS2
DGAT2	PSAT1
SPHK2	DGKB
OAT	SMPD4
DGKA	BAAT
KARS1	ALDH1B1
PDE4A	CYP19A1
ACSM2B	HADHB
FECH	CYP2C9
PLPP1	CYP2C8
ACSL4	RDH12
SIRT2	SLC44A3
PLA2G10	ALDH9A1
NEDD4	NME7
SLC44A1	SLC27A3
RNF126	SCCPDH
ASNS	PARP1
CHAT	ADPRH
RAD18	AWAT2
HLTF	PXDNL
SLC6A15	AK3
RDH11	PTGES
ALDH3A2	LRSAM1
UBE2D1	ALLC
HSD17B10	PANK1
CHFR	LPCAT1
TRHDE	CERS3
P4HA2	ENPP3
PDE8A	TDH
ABCB11	ACSS1
DHRS9	PLA2G2F
PTGS2	CES5A
MGLL	ALDH4A1
PLD1	RDH13
MKRN2	UBE2Q1
SLC46A1	CYP3A4
NT5C2	TIPARP
DGKD	FAAH2
UBE2T	AK8
SIRT6	CYP2C19
NAALAD2	SLC6A5
UBE2A	GPT2
ACER3	UGT1A6
UBE2K	CYP2S1
ITCH	GGT6
UBE2D4	SLC3A2
SLC1A3	RNF187
LIPE	PLA2G4F
RDH8	UBE2E3
CNOT4	CEL
CPOX	KYAT1
HSP90AA1	SMPDL3A
ARG2	CES3
UBA5	RIMKLA
AACS	ACOT4
RNF13	GLDC
SLC27A5	PARP10
HAL	SEPHS2
SLCO1A2	UBA7
HADHA	LIPF
CAD	ADI1
AK6	SLC25A18
HACE1	AFMID
DDHD2	ACOT1
FOLH1	CYP4F12
SEPHS1	CYP4F8
HUWE1	CYP4F3
ACOX3	NHLRC1
ACHE	RNF133
BRAP	PLA2G4E
NOS1	ENTPD8
BLVRB	ADH7
MUL1	SLC22A5
CERS4	PNP
PITPNM2	ACOT6
DLD	NEURL1B
PITPNM3	DHRS4L1
SLC17A6	UGT1A1
SLC7A8	UGT1A7
RNF31	RNF115
HECTD1
ADA2
VNN3
PTGS1
PDE6C
CYP26A1
SIRT1
ACOT7
CDC34
MTAP
GGT5
GGT1
PRODH
PLA2G3
GCAT
GGTLC2
CYP2D6
CYB5R3
CHKB
HMOX1
PNPLA3
TNRC6B
SLC25A17
DDHD1
SLC10A1
CCNB1IP1
GSS
SLCO4A1
CDS2
SLC32A1
ACOT8
LPIN2
LIPG
RNF125
MIB1
MID1
PRPS2
ABCD1
PARP4
SLC25A15
DGKH
MGRN1
CYB5B
NME3
SMPD3
SLC7A6
PLA2G15
NME4
SLC7A5
STUB1
UBE2I
EARS2
HMOX2
AQP9
HERC1
ACSBG1
DECR1
UBE2W
UBR5
PYCR3
ASAH1
SARS2
SLC17A7
IL4I1
SLC1A6
LGALS13
CLC
PLD3
PLIN3
SULT2A1
PLA2G4C
DBP
PLPPR2
BCAT2
PDE4C
NAMPT
CBLL1
ZC3HAV1
GARS1
CYP3A5
AIMP2
NRF1
BLVRA
SLC1A1
AK1
UBE2R2
LIPA
NEURL1
UBE2S
CYP2C18
RNF167
ALOX12
ABCC3
SMURF2
UGT2B10
UBE2D3
AADAT
BST1
UBE4A
CBL
SLC1A2
SLC15A3
PITPNM1
CHKA
DAO
PTGES3
ACSS3
PARP11
ALDH2
ART4
SLC38A1
SLCO1B3
RNF8
GPLD1
VNN1
VNN2
SLC22A2
PDE10A
SLC29A1
HARS2
NUDT12
NME5
PDE8B
RNF130
SLC27A6
PDE4D
AGXT2
UBE3A
RBP2
RBP1
BCHE
CBLB
AADAC
ABHD14A-ACY1
PDE1A
FANCL
GLS
ABCB6
SLC5A7
ODC1
BIRC6
SLC25A12
SLC1A4
KYNU
FARSB
AMPD2
RNF19B
PLA2G4A
AMPD1
AGMAT
WARS2
NT5C1A
KMO
PLA2G2D
FAAH
PRDX6
DARS2
PLPPR5
PLPPR4
RNF146
ARG1
ABCG2
UBE2B
TRIM32
ACOT2
GOT1
PANK3
RCL1
SLC25A2
PDZD11
EPHX2
LYPLA1
RDH10
EPX
LRAT
ABCC11
PLBD1
FABP3
RBBP6
NT5C3A
AKR1D1
P4HA1
WWP1
PDE1B
SARDH
SLC36A1
PLA2G12A
ACSL3
MOCS3
PEPD
ATP8A1
SIRT5
OARD1
AARS2
GNMT
EEF1E1
GOT2
SLC10A2
ABCC4
NT5C
GPCPD1
PANK2
ITPA
UROD
HECTD3
ASL
SGPP1
PPCS
PLA2G5
UBR4
ECHS1
PAICS
PPAT
PDE11A
GAD1
HERC2
DUT
BBOX1
DCTD
PLD2
SLC44A2
PARP2
ART1
DOHH
PLPPR3
GDPD2
GDF1
SLC27A1
ACSBG2
PXDN
CYP2E1
PNPLA7
ASS1
UBE2M
SLC7A10
UBE4B
UBA1
GGT7
ACSS2
IDO1
PPT1
GFPT2
UBE2D2
TRAF7
TRIM5
UBE2G1
DDC
ACY3
LPIN3
SLC14A2
PDE6A
ALOX5AP
RNF128
PDE6B
CNDP2
MACROD1
GGT2
MKRN1
AMPD3
HSD17B4
CEPT1
SLC38A2
LPIN1
CMPK2
NARS1
SLCO1B1
FOLH1B
CYP2J2
RNF138
DAGLA
FADS2
GGACT
CARS2
PSAT1
CD36
UGT2A3
UGT2B28
PNPLA8
NT5E
GLS2
RDH5
SMPD2
MDM2
GLUL
CYP27A1
DGKB
SMPD4
GAD2
FPGS
BAAT
ENPP2
ALDH1B1
SLC22A7
BPHL
CLPS
RNF144B
VARS2
IL18BP
NARS2
GGH
PARP6
SLC28A2
CYP19A1
KYAT3
SLC44A5
RTCA
SELENOI
HADHB
CYP1B1
SLC5A6
SLC3A1
CYP2C9
CYP2C8
CH25H
ENTPD1
RBP4
PLA2G12B
BARD1
HECW2
PARP9
PARP16
HERC3
GPAT3
PDE5A
NAAA
HADH
RNF185
PDE6H
YARS2
SLC38A4
SLC15A4
SLC7A1
RDH16
CERS5
RDH12
AK7
SLC27A2
HDC
UBE2Q2
CYP1A1
CYP1A2
GCSH
DPEP3
NPEPPS
ABCA8
SLC14A1
NT5C3B
PLPP2
SIRT3
TRPM2
AKT1
CBLC
AZIN2
CYP4B1
SLC44A3
ALDH9A1
NME7
COP1
CERS2
SLC27A3
SCCPDH
MBOAT2
PARP1
PYCR2
CHAC2
LIPT1
UBR3
SLC25A38
UBA3
ADPRH
AMT
DGKQ
FABP2
UGT3A1
FARS2
LGSN
RARS2
RNF217
SHPRH
SLC22A3
RBAK
CLTRN
AWAT2
PRPS1
PXDNL
PLPP5
ADHFE1
DPYS
AK3
UHRF2
PLPPR1
PTGES2
MIGA2
PTGES
LRSAM1
HERC4
GLUD1
CYP17A1
DGKZ
GLYAT
SLC43A1
P4HA3
GGTLC1
HNMT
CNDP1
SLC7A11
UBE3B
ALLC
RNF144A
ACSL1
PARP8
PDE3B
PANK1
PLA2R1
LPCAT1
NMRAL1
TRIP12
DGKE
GDPD1
AK5
CERS3
ENPP3
TDH
TRIM11
SH3RF1
PDE1C
ACSS1
CYP2U1
AK9
AGPAT5
SLC7A7
UGT2B4
ADK
DCK
ART3
SH3RF2
PTDSS1
UBE2L6
GLYATL2
PDE6D
NTAN1
DHRS4
AASDH
DGKI
PANK4
TRIM63
GDPD5
ALAS2
GPAT4
PLA2G2F
GART
UBE2Z
CBR1
CBR3
HLCS
ADPGK
PLA2G4D
CES5A
ALDH4A1
UBR1
AMFR
UBE2J2
PDE9A
AGPAT3
FTCD
RDH13
UBE2Q1
CYP3A4
CYP3A7
CYP11B1
NAPEPLD
ACOX1
NAGS
ALOX15
SYVN1
CYP4A22
CMPK1
SLC1A7
PARS2
PLPP3
AK4
DHRS3
BPNT1
ZSWIM2
SGPP2
RNF149
RNF25
FABP1
CDS1
GMPS
TIPARP
RPP14
RCHY1
PLB1
SLC6A20
LIPH
SLC51A
AIMP1
RNF123
HPGD
RNF180
ENPP6
SLC6A18
ACSL6
FABP7
DAGLB
FABP5
NOS3
ALDH7A1
NUDT2
ABCA1
HECTD2
SLC7A3
FAAH2
NUDT5
AK8
CYP2C19
SLC6A5
LIPC
GPT2
ASPG
SMPD1
TPP1
RAG1
PLD4
RIMKLB
TK2
NNMT
ACSM1
ANPEP
GLYATL1
NAT16
ACSF2
SLC27A4
UGT1A6
DPEP2
ART5
ACAA2
LPO
CYP2S1
GPT
SLC43A2
GGT6
KLK1
KLK2
ACER1
TK1
ECI1
SLC3A2
ENTPD3
RNF187
DTYMK
RFWD3
UGT3A2
PLA2G4F
JMJD7-PLA2G4B
GOT1L1
AGPAT2
FASN
UBE2E3
UBE2E1
ADPRM
FABP6
FABP4
NUDT9
SDR16C5
CEL
RNF139
PLA2G1B
KYAT1
UGT2B7
CANT1
PDE7B
GPHN
GATM
CTPS1
CYP4F11
NME6
MBOAT1
MACROD2
CERS6
AGXT
CARNS1
PDE3A
SMPDL3A
CES3
CES2
NADSYN1
LCLAT1
ADH6
SH3RF3
PARP14
PARP15
UGT2A1
CNP
PHOSPHO1
SLC6A19
SLCO2A1
SLC29A2
PTDSS2
SLC22A1
UBE2C
CLCF1
PNLIP
CBLL2
UBE2O
SPHK1
LPCAT4
SLCO3A1
RNF152
ACSF3
TYMS
SHMT1
ACER2
RIMKLA
UBE2U
ACOT4
SLC25A22
PNPLA2
UBE2N
GLDC
SLC25A20
PARP10
CPNE7
OPLAH
PFAS
FARSA
CYP11B2
MKRN3
ALOX12B
SLC17A8
ALOX15B
PLD6
PIPOX
SEPHS2
DCTPP1
ZNRF2
MIGA1
RNF182
SLC36A4
PJA1
SIAH2
RNF41
ENPP7
UBA7
SHMT2
UBE2E2
LIPF
ADI1
TTC3
GLUD2
SLC25A18
PYCR1
ABAT
AFMID
ACSM5
ACSM2A
UBE2F
ACOT1
PLA2G6
PDE4B
UBE2G2
DGAT1
NT5C1B
PRKN
PDE6G
UBE2L3
CYP4F2
CYP4Z1
ZNRF1
SLC51B
CYP4F12
SLC36A3
SLC36A2
CYP4X1
CYP4F8
CYP4F3
UBE2H
PDE2A
PNLIPRP1
CYP4A11
ENTPD5
SIRT7
NHLRC1
DHRS4L2
ADH1A
PLA2G2C
RNF133
PLA2G4E
PLA2G2A
SLC38A3
ASAH2
DPYD
IDO2
PLA2G2E
ENTPD8
LIPI
FHIT
AKR1C3
ADH7
ASMT
SIAH1
TPK1
SLC6A9
ADH1B
UGT2B15
ADA
ACSL5
ENTPD4
TRIM33
SLC22A5
CYP2B6
FABP12
CYP2F1
SLC28A3
MIB2
TOPORS
ENTPD6
ENPP1
CYP2A13
UGT2B17
ADH5
ENTPD7
CYP2A7
ADH4
SLC29A3
WWP2
GFPT1
TAT
CALM1
ECI2
SMURF1
PNP
UBE2J1
CES1
DZIP3
APRT
PJA2
PLPP4
PNLIPRP3
AWAT1
RNF5
AGPAT1
SLC44A4
FABP9
PDE7A
NT5M
ACOT6
ATP10A
LTC4S
UGT2B11
TAX1BP3
NEURL1B
ACSM4
UBE2QL1
PPT2
CERS1
DHRS4L1
PRPS1L1
RNF103
MEIKIN
NME1
ADSL
RDH14
UGT1A9
CRCP
EGFL8
UGT1A1
PISD
AMACR
UGT1A8
UGT1A10
DECR2
NME2
PLA2G4B
LEFTY1
ACY1
UGT1A7
UGT1A4
SCARF2
MARS2
ADH1C
NT5C1B-RDH14
PRODH2
CYP2A6
RNF115
PNLIPRP2
SLC6A14
UGT2A2
TAF9
GGTLC3
DGKK
UHRF1
UBE2NL
